# Supplementary figures and images for: Liver Transcriptome Changes of Hyla Rabbit in Response to Chronic Heat Stress
Source: MDPI journal article supplement (doi:10.3390/ani9121141), 2019-12-13

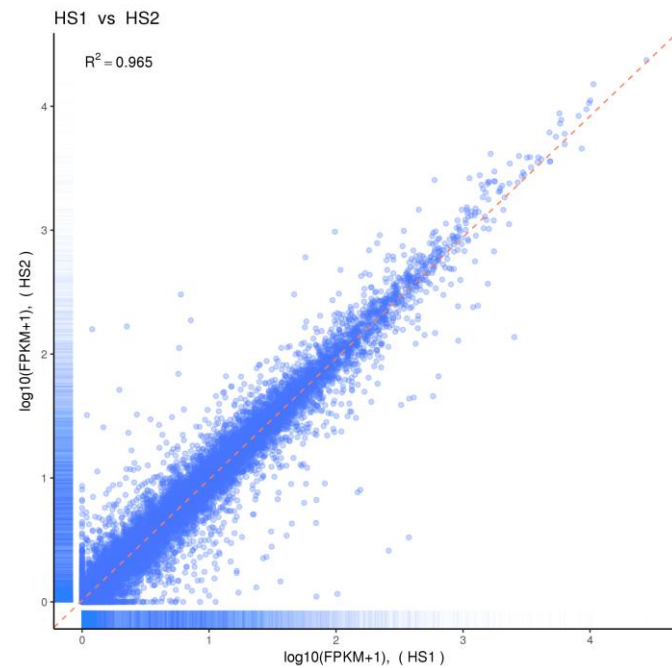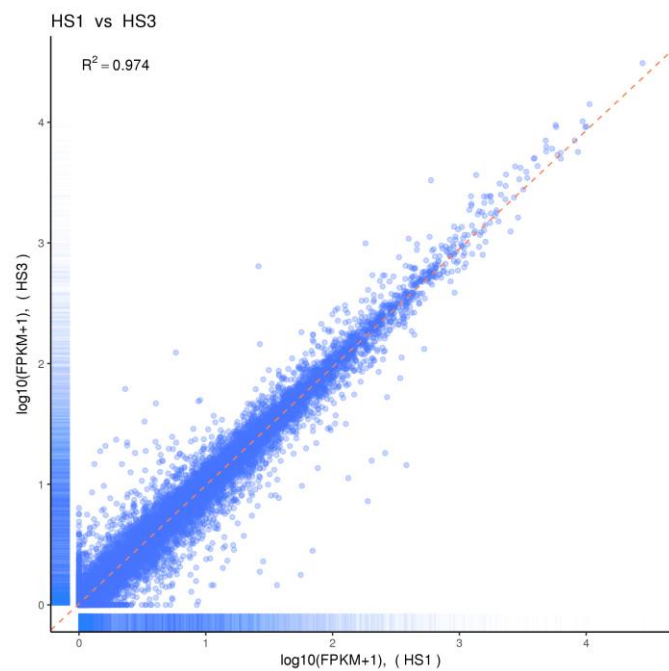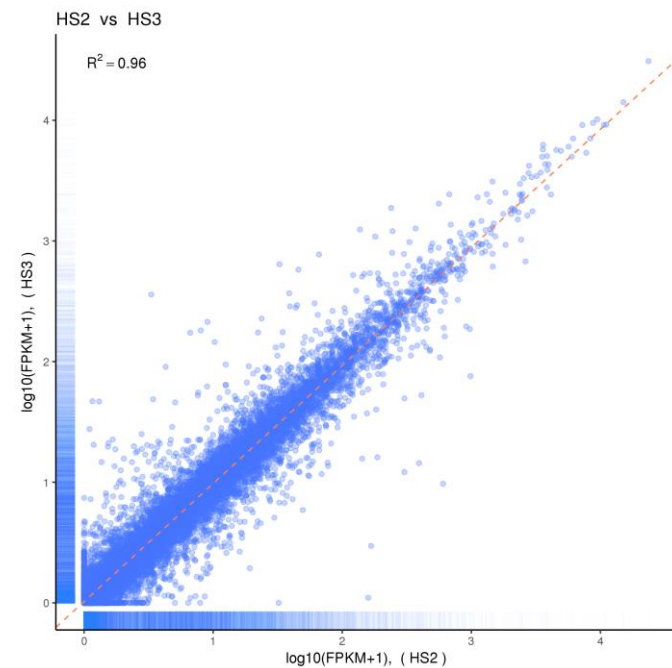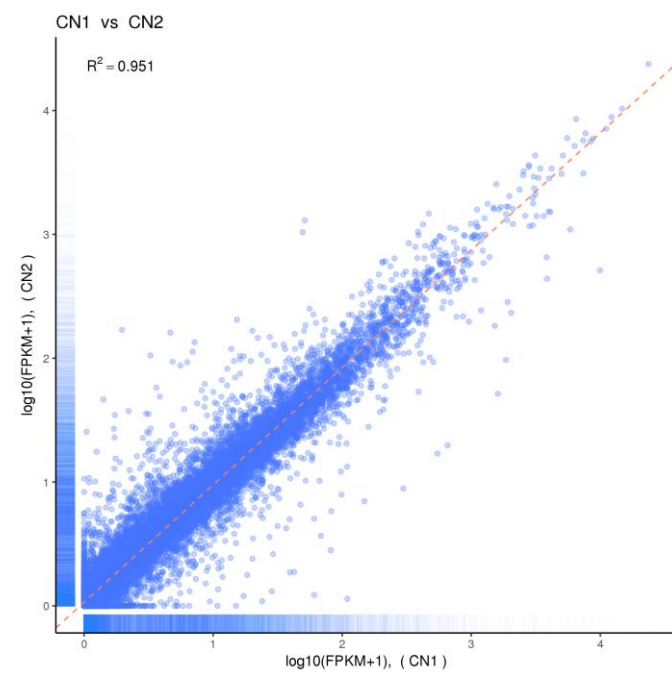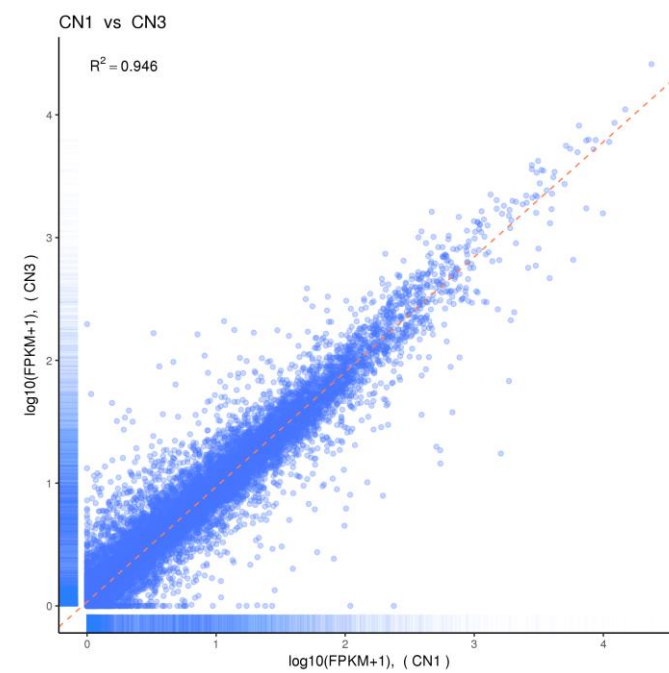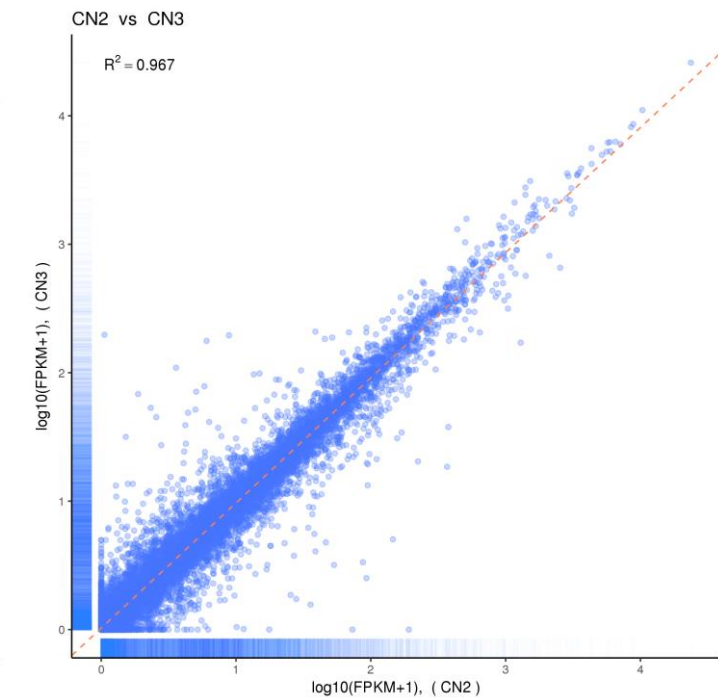

Supplement: s1 [file s1]
